SUMMER 2015 | VOLUME 27 | NUMBER 3

The Journal of  
**Neuropsychiatry**  
and Clinical Neurosciences

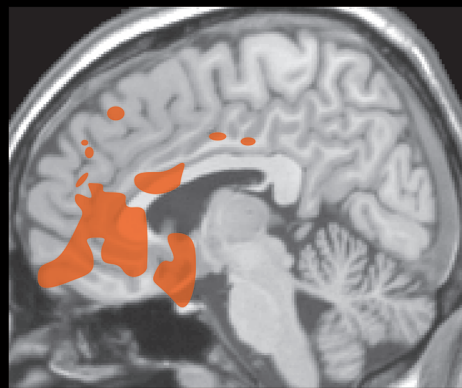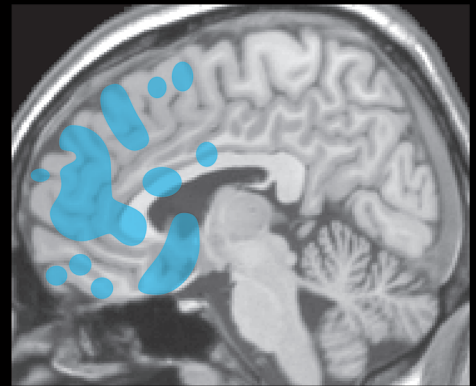

Neurobiology of Adult ADHD: Emerging Evidence  
for Network Dysfunctions

Alexithymia in Neurological Disease: A Review

Preliminary Findings Supporting Insula Metabolic Activity as a Predictor of  
Outcome to Psychotherapy and Medication Treatments for Depression

Pilot Study of Neurological Soft Signs and Depressive and Postconcussive  
Symptoms During Recovery From Mild Traumatic Brain Injury (mTBI)

Official Journal of the American Neuropsychiatric Association  
[neuro.psychiatryonline.org](http://neuro.psychiatryonline.org)
