27<sup>th</sup> Annual Meeting

# American Neuropsychiatric Association

The Westin Gaslamp Quarter

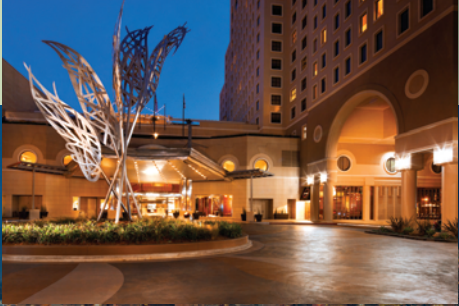

## San Diego, California March 16-19, 2016

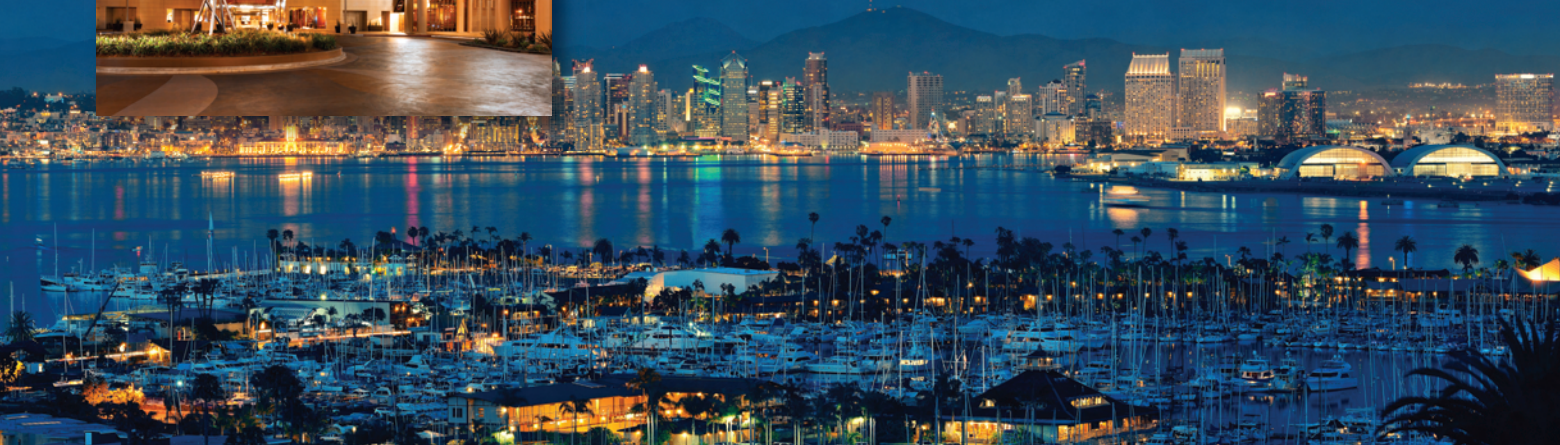

## Meeting Announcement &

You are invited to submit abstracts reporting new research or challenging clinical cases for poster or platform presentations. **DEADLINE** for receipt of abstracts is **October 26, 2015.**

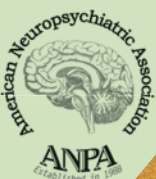

# Call for Abstracts

Abstracts presented at the meeting will be published online in the Spring 2016 issue of *The Journal of Neuropsychiatry and Clinical Neurosciences*.

Prior to submitting abstracts, please refer to our website for information about ANPA's award programs, platform sessions, and poster session.

Complete submission instructions will be available July 10, 2015 at:

[www.anpaonline.org](http://www.anpaonline.org)

For more information contact the American Neuropsychiatric Association office at: [anpaoffice@gmail.com](mailto:anpaoffice@gmail.com)

SAN  
DIEGO

# The Journal of Neuropsychiatry and Clinical Neurosciences

Official Journal of the American Neuropsychiatric Association

## Editorial Board

The *Journal of Neuropsychiatry and Clinical Neurosciences* (ISSN 0895-0172), is published quarterly by the American Psychiatric Association (APA), 1000 Wilson Blvd., Suite 1825, Arlington, VA 22209. Copyright © 2015 American Psychiatric Association. The *Journal of Neuropsychiatry and Clinical Neurosciences*, is protected by copyright and may not be reproduced in any manner without written permission. The *Journal of Neuropsychiatry and Clinical Neurosciences* is abstracted/indexed in *Chemical Abstracts*, *Current Contents/Clinical Medicine*®, *EMBASE/Excerpta Medica*, *Index Medicus/MEDLINE/MEDLARS*, *PsycINFO*, *Psychological Abstracts*, *Research Alert*®, and *Sci Search*®. It is available through University Microfilms, Inc., 300 North Zeeb Road, Ann Arbor, MI 48106, in microform, electronic, or paper format.

Manuscript submissions should no longer be sent by mail. Please visit <http://mc.manuscriptcentral.com> to upload a paper online.

U.S. subscriptions are \$250 per year (4 issues) individual; \$200 for APA members; international subscriptions are \$377 per year; \$302 for international members. APA Members receive 20% discount off regular individual subscription rate. Institutional Subscriptions are tier priced. For institutional site license information and pricing, please email us at [appi@psych.org](mailto:appi@psych.org), call (800) 368-5777 or visit [www.appi.org/ForLibrarians/](http://www.appi.org/ForLibrarians/). The *Journal of Neuropsychiatry and Clinical Neurosciences*, 1000 Wilson Blvd., Suite 1825, Arlington, VA 22209.

Advertising inquiries may be directed to Tim Wolfinger at PMI, 30 East 33rd St., New York, NY 10016; (212) 904-0379; [twolfinger@pminy.com](mailto:twolfinger@pminy.com).

APA is not responsible for statements made in this publication by contributors or advertisers. Unless stated, material in the *Journal of Neuropsychiatry and Clinical Neurosciences* does not reflect the endorsement, official attitude, or position of APA or the American Neuropsychiatric Association.

Periodicals postage paid at Arlington, VA, and additional mailing offices. POSTMASTER: Send address changes to the *Journal of Neuropsychiatry and Clinical Neurosciences*, 1000 Wilson Blvd., Suite 1825, Arlington, VA 22209.

**Editor**  
Stuart C. Yudofsky, M.D.

**Deputy Editors**  
C. Alan Anderson, M.D.  
David B. Arciniegas, M.D.  
Robert E. Hales, M.D., M.B.A.

**Assistant to the Editors**  
T. Angelita Garcia, M.B.A.

**Consulting Editors**  
C. Edward Coffey, M.D.  
Thomas W. McAllister, M.D.  
Henry Nasrallah, M.D.  
Fred Ovsiew, M.D.  
Jonathan M. Silver, M.D.

**Associate Editors**  
Sheldon Benjamin, M.D.  
Kevin J. Black, M.D.  
Nashaat N. Boutros, M.D.  
John J. Campbell, M.D.  
Miles Cunningham, M.D.  
Michael Ebert, M.D.  
Richard B. Ferrell, M.D.  
Laura A. Flashman, Ph.D.  
Yonas E. Geda, M.D.  
Daniel I. Kaufer, M.D.  
W. Curt LaFrance, M.D.  
Edward C. Lauterbach, M.D.  
Mario Mendez, M.D., Ph.D.  
Charles Nemeroff, M.D., Ph.D.  
Trevor R. P. Price, M.D.  
Robert G. Robinson, M.D.  
David A. Silbersweig, M.D.  
Robert Stern, Ph.D.  
Kaloyan S. Tanev, M.D.  
Hal S. Wortzel, M.D.

**Neuropsychiatry Classics Editor**  
Thomas C. Neylan, M.D.

**Book Review Editor**  
Paula T. Trzepacz, M.D.

**Windows to the Brain Editors**  
Robin A. Hurley, M.D.  
L. Anne Hayman, M.D.  
Katherine H. Taber, Ph.D.

**American Psychiatric Association  
Publishing**  
Rebecca D. Rinehart  
*Publisher*  
Michael Roy  
*Editorial Director, Journals*  
Angela Moore  
*Editorial Manager*  
Susan Westrate  
*Production Manager, Journals*  
Patrick Hansard  
*Director of Marketing and Sales*  
Christopher Keene  
*Sales Manager*  
Roger Domras  
*Director of Fulfillment and  
Circulation*

AMERICAN  
PSYCHIATRIC  
ASSOCIATION  
PUBLISHING

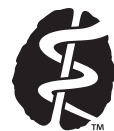

Please visit the Journal's website at [neuro.psychiatryonline.org](http://neuro.psychiatryonline.org)
